# Supplementary material for: Maternal characteristics associated with gestational weight gain in France: a population-based, nationally representative study
Source: HighWire-hosted journal article supplement (doi:10.1136/bmjopen-2021-049497), 2021-07-01
Supplement: bmjopen-2021-049497supp001_data_supplement.pdf [file bmjopen-2021-049497supp001_data_supplement.pdf]

eTable 1. Nationally-representative estimates of GWG and GWG adequacy<sup>a</sup> in France by survey year (French National Perinatal Survey 2010 and 2016; N=24850)

|                        | 2010        |                       |                              |                          |                           | 2016        |                       |                              |                          |                           |
|------------------------|-------------|-----------------------|------------------------------|--------------------------|---------------------------|-------------|-----------------------|------------------------------|--------------------------|---------------------------|
|                        | N (%)       | GWG (kg)<br>mean (SD) | Insufficient<br>GWG<br>n (%) | Adequate<br>GWG<br>n (%) | Excessive<br>GWG<br>n (%) | N (%)       | GWG (kg)<br>mean (SD) | Insufficient<br>GWG<br>n (%) | Adequate<br>GWG<br>n (%) | Excessive<br>GWG<br>n (%) |
| <b>Total</b>           | 13455       | 13.2 (5.6)            | 3443 (25.9)                  | 5006 (37.7)              | 4839 (36.4)               | 11395       | 12.7 (5.7)            | 3163 (28.0)                  | 4100 (36.2)              | 4053 (35.8)               |
| <b>BMI<sup>b</sup></b> |             |                       |                              |                          |                           |             |                       |                              |                          |                           |
| Underweight            | 1110 (8.3)  | 14.0 (4.7)            | 415 (37.5)                   | 454 (41.0)               | 239 (21.6)                | 850 (7.5)   | 13.7 (4.9)            | 347 (40.8)                   | 331 (38.9)               | 172 (20.2)                |
| Normal weight          | 8601 (64.7) | 13.9 (4.8)            | 2394 (27.9)                  | 3614 (42.1)              | 2583 (30.1)               | 6905 (60.9) | 13.7 (4.9)            | 2079 (30.2)                  | 2824 (41.0)              | 1991 (28.9)               |
| Overweight             | 2289 (17.2) | 12.4 (5.9)            | 310 (13.6)                   | 662 (28.9)               | 1315 (57.5)               | 2256 (19.9) | 12.0 (6.0)            | 377 (16.7)                   | 641 (28.4)               | 1237 (54.9)               |
| All obese              | 1303 (9.8)  | 8.9 (7.4)             | 324 (24.9)                   | 276 (21.2)               | 702 (53.9)                | 1322 (11.7) | 8.4 (7.3)             | 360 (27.3)                   | 304 (23.1)               | 653 (49.6)                |
| Obese class I          | 893 (6.7)   | 10.2 (6.7)            | 162 (18.2)                   | 190 (21.3)               | 540 (60.5)                | 909 (8.0)   | 9.5 (6.7)             | 193 (21.3)                   | 202 (22.3)               | 510 (56.4)                |
| Obese class II         | 280 (2.1)   | 7.0 (8.0)             | 92 (32.9)                    | 64 (22.9)                | 124 (44.3)                | 309 (2.7)   | 7.0 (7.4)             | 109 (35.4)                   | 74 (24.0)                | 125 (40.6)                |
| Obese class III        | 130 (1.0)   | 4.2 (8.1)             | 70 (53.8)                    | 22 (16.9)                | 38 (29.2)                 | 104 (0.9)   | 2.8 (8.6)             | 58 (55.8)                    | 28 (26.9)                | 18 (17.3)                 |

Abbreviations: GWG= gestational weight gain; BMI= body mass index; SD= standard deviation; IOM= Institute of Medicine

<sup>a</sup>Based on 2009 IOM thresholds,<sup>1</sup> accounting for gestational age at birth;<sup>2,3</sup> considered insufficient GWG if below recommendation, adequate if within recommendation, or excessive if above recommendation

<sup>b</sup>BMI (kg/m<sup>2</sup>): underweight: <18.5; normal weight: 18.5-24.9; overweight: 25-29.9; obese: ≥30 (class I [30-34.9]; class II [35-39.9]; class III [≥40])<sup>4</sup>

Table 2: Characteristics of the study population, in comparison to those of women excluded for missing or implausible GWG (French National Perinatal Survey 2010 and 2016)

|                                                | Included (N=24850)<br>n (%) | Excluded (N=2269)<br>n (%) |
|------------------------------------------------|-----------------------------|----------------------------|
| <b>BMI<sup>a</sup></b>                         |                             |                            |
| Underweight                                    | 1960 (8.0)                  | 7 (4.2)                    |
| Normal weight                                  | 15506 (62.9)                | 92 (55.1)                  |
| Overweight                                     | 4545 (18.4)                 | 33 (19.8)                  |
| All obese                                      | 2625 (10.7)                 | 35 (21.0)                  |
| Obese class I                                  | 1802 (7.3)                  | 25 (15.0)                  |
| Obese class II                                 | 589 (2.4)                   | 7 (4.2)                    |
| Obese class III                                | 234 (0.9)                   | 3 (1.8)                    |
| <b>Parity</b>                                  |                             |                            |
| Multiparous                                    | 14061 (56.7)                | 1100 (63.5)                |
| Primiparous                                    | 10722 (43.3)                | 632 (36.5)                 |
| <b>Age</b>                                     |                             |                            |
| <25 years                                      | 3716 (15.0)                 | 370 (22.0)                 |
| 25-29 years                                    | 8126 (32.7)                 | 482 (28.6)                 |
| 30-34 years                                    | 8079 (32.5)                 | 476 (28.3)                 |
| ≥35 years                                      | 4918 (19.8)                 | 356 (21.1)                 |
| <b>Country or region of birth</b>              |                             |                            |
| France                                         | 20398 (82.2)                | 280 (53.6)                 |
| Europe                                         | 957 (3.9)                   | 47 (9.0)                   |
| Northern Africa                                | 1720 (6.9)                  | 63 (12.1)                  |
| Sub-Saharan Africa                             | 1024 (4.1)                  | 101 (19.3)                 |
| Other                                          | 719 (2.9)                   | 31 (5.9)                   |
| <b>Employment during pregnancy</b>             |                             |                            |
| None                                           | 7089 (28.7)                 | 404 (60.3)                 |
| Stopped working during pregnancy               |                             |                            |
| Before 14+0 wks gestation                      | 1595 (6.5)                  | 20 (3.0)                   |
| 14+0 to 27+6 wks gestation                     | 6701 (27.1)                 | 58 (8.7)                   |
| 28+0 to 31+6 wks gestation                     | 4243 (17.2)                 | 24 (3.6)                   |
| Unknown stop point                             | 317 (1.3)                   | 124 (18.5)                 |
| Continued working to ≥32 wks gestation         | 4743 (19.2)                 | 40 (6.0)                   |
| <b>Education</b>                               |                             |                            |
| Less than high school                          | 2158 (8.7)                  | 217 (37.0)                 |
| High school                                    | 9157 (37.1)                 | 226 (38.5)                 |
| 1-2 years post-graduation                      | 5086 (20.6)                 | 67 (11.4)                  |
| 3-4 years post-graduation                      | 4466 (18.1)                 | 50 (8.5)                   |
| ≥5 years post-graduation                       | 3798 (15.4)                 | 27 (4.6)                   |
| <b>Social deprivation<sup>b</sup></b>          |                             |                            |
| No                                             | 20424 (82.2)                | 304 (60.9)                 |
| Yes                                            | 4414 (17.8)                 | 195 (39.1)                 |
| <b>Smoking habits before, during pregnancy</b> |                             |                            |
| Non smoker                                     | 17216 (69.9)                | 297 (72.1)                 |
| Decreased smoking in pregnancy                 |                             |                            |
| <10 cig/d, stopped                             | 1855 (7.5)                  | 18 (4.4)                   |
| ≥10 cig/d, stopped                             | 1402 (5.7)                  | 17 (4.1)                   |
| ≥10 cig/d, <10 cig/d                           | 2185 (8.9)                  | 21 (5.1)                   |
| Maintained smoking level in pregnancy          |                             |                            |
| <10 cig/d, <10 cig/d                           | 845 (3.4)                   | 32 (7.8)                   |
| ≥10 cig/d, ≥10 cig/d                           | 1081 (4.4)                  | 26 (6.3)                   |
| Increased smoking in pregnancy <sup>c</sup>    | 47 (0.2)                    | 1 (0.2)                    |
| <b>Insufficient care<sup>d</sup></b>           |                             |                            |
| No                                             | 23515 (94.7)                | 673 (83.3)                 |
| Yes                                            | 1328 (5.3)                  | 135 (16.7)                 |
| <b>Diabetes</b>                                |                             |                            |
| No                                             | 22414 (91.5)                | 1490 (89.4)                |
| Yes, diet controlled                           | 633 (2.6)                   | 42 (2.5)                   |
| Yes, insulin controlled                        | 1458 (5.9)                  | 134 (8.0)                  |
| <b>Preexisting hypertension</b>                |                             |                            |
| No                                             | 24229 (98.0)                | 1656 (97.5)                |
| Yes                                            | 504 (2.0)                   | 42 (2.5)                   |

Abbreviations: GWG= gestational weight gain; BMI= body mass index; cig/d= cigarettes per day; GA= gestational age

<sup>a</sup>BMI (kg/m<sup>2</sup>): underweight: <18.5; normal weight: 18.5-24.9; overweight: 25-29.9; obese: ≥30 (class I [30-34.9]; class II [35-39.9]; class III [≥40])<sup>4</sup>

<sup>b</sup>No stable home (homeless or living in a hotel or caravan) and/or no salary nor unemployment allowance

<sup>c</sup>Non-smoker, <10 cig/d; non-smoker, ≥10 cig/d; <10 cig/d, ≥10 cig/d

<sup>d</sup>Late pregnancy declaration (national health insurance not notified in first three completed months and no nuchal translucency measurement in first trimester) or insufficient sonograms (<2 if GA at birth 24-33 weeks; <3 if GA at birth 34 weeks or later) or prenatal visits (<3 if GA at birth 24-27 weeks; <4 if GA at birth 28-31 weeks; <5 if GA at birth 32-35 weeks; <6 if GA at birth 36 weeks or later), consistent with French guidelines for low risk women

## References

1. Institute of Medicine. Weight gain during pregnancy: Reexamining the guidelines. 2009:1-13.
2. Bodnar LM, Siega-Riz AM, Simhan HN, Himes KP, Abrams B. Severe obesity, gestational weight gain, and adverse birth outcomes. *American Journal of Clinical Nutrition*. 2010;91(6):1642-1648.
3. Liu J, Gallagher AE, Carta CM, Torres ME, Moran R, Wilcox S. Racial differences in gestational weight gain and pregnancy-related hypertension. *Annals of Epidemiology*. 2014;24(6):441-447.
4. World Health Organization. Obesity: preventing and managing the global epidemic: report of a WHO consultation. Geneva, Switzerland: WHO Technical Report Series; 2000. Report No: 894.
